# Supplementary material for: Chalcone-Induced Apoptosis through Caspase-Dependent Intrinsic Pathways in Human Hepatocellular Carcinoma Cells
Source: PubMed Central journal article supplement (PMC4783989; doi:10.3390/ijms17020260), 2016-02-22
Supplement: ijms-17-00260-s001.pdf [file ijms-17-00260-s001.pdf]

# Supplementary Materials: Chalcone-Induced Apoptosis through Caspase-Dependent Intrinsic Pathways in Human Hepatocellular Carcinoma Cells

Rodrigo Ramirez-Tagle, Carlos A. Escobar, Valentina Romero, Ignacio Montorfano, Ricardo Armisen, Vincenzo Borgna, Emanuel Jeldes, Luis Pizarro, Felipe Simon and Cesar Echeverria

**Table S1.** Primary and secondary antibodies used in Western blot experiments.

| Primary Ab      | Dilution | Source | Incubation Time | Incubation Temperature | Band                    |
|-----------------|----------|--------|-----------------|------------------------|-------------------------|
| Bax             | 1:500    | Rabbit | 2 h             | RT                     | Santa Cruz, CA, USA     |
| Bcl-2           | 1:500    | Rabbit | 2 h             | RT                     | Santa Cruz, CA, USA     |
| Caspase-3       | 1:1000   | Rabbit | 2 h             | RT                     | Cell Signaling, MA, USA |
| Caspase-8       | 1:1000   | Mouse  | 2 h             | RT                     | Santa Cruz, CA, USA     |
| Caspase-9       | 1:1000   | Mouse  | 2 h             | RT                     | Cell Signaling, MA, USA |
| HSP70           | 1:5000   | Mouse  | 2 h             | RT                     | Origene, MD, USA        |
| Secondary Ab    | Dilution | Source | Incubation Time | Incubation Temperature | Band                    |
| Anti-Mouse HRP  | 1:5000   | Goat   | 2 h             | RT                     | Millipore, MA, USA      |
| Anti-Rabbit HRP | 1:5000   | Goat   | 2 h             | RT                     | Millipore, MA, USA      |

Ab: antibody; RT: room temperature; ON: overnight.

**Table S2.** Primary and secondary antibodies used in immunocytochemistry.

| Primary Ab            | Dilution | Source | Incubation Time | Incubation Temperature | Band                    |
|-----------------------|----------|--------|-----------------|------------------------|-------------------------|
| Bcl-2                 | 1:100    | Rabbit | ON              | 4 °C                   | Santa Cruz, CA, USA     |
| Caspase-3             | 1:100    | Rabbit | ON              | 4 °C                   | Cell Signaling, MA, USA |
| $\alpha$ -Tubulin     | 1:500    | Mouse  | ON              | 4 °C                   | Sigma-Aldrich, Mo, USA  |
| Secondary Ab          | Dilution | Source | Incubation Time | Incubation Temperature | Band                    |
| Anti-Rabbit Alexa-594 | 1:250    | Goat   | ON              | 4 °C                   | Invitrogen, CA, USA     |
| Anti-Mouse Alexa-488  | 1:250    | Goat   | ON              | 4 °C                   | Invitrogen, CA, USA     |

Ab: antibody; RT: room temperature; ON: overnight.
